# Supplementary material
Source: MDPI journal article supplement (https://www.mdpi.com/2077-0472/12/2/293)
Supplement: s1 [file s1]

**Table 1.** S Correlation coefficient matrix for vermicomposts.

|      | Ntot    | TOC      | Stot    | OM       | SH       | WEOC     | P       | CL      | Na      | K       | Mg      | Ca      | Cu      | Zn      | Mn      | Ni      | Fe      | Cr  |
|------|---------|----------|---------|----------|----------|----------|---------|---------|---------|---------|---------|---------|---------|---------|---------|---------|---------|-----|
| TOC  | n.s     |          |         |          |          |          |         |         |         |         |         |         |         |         |         |         |         |     |
| Stot | n.s     | 0.755*   |         |          |          |          |         |         |         |         |         |         |         |         |         |         |         |     |
| OM   | n.s     | 0.974**  | n.s     |          |          |          |         |         |         |         |         |         |         |         |         |         |         |     |
| SH   | n.s     | 0.855**  | 0.962** | 0.733*   |          |          |         |         |         |         |         |         |         |         |         |         |         |     |
| WEOC | n.s     | 0.808**  | 0.949** | 0.685*   | 0.930**  |          |         |         |         |         |         |         |         |         |         |         |         |     |
| P    | 0.804*  | -0.871** | n.s     | -0.941** | n.s      | n.s      |         |         |         |         |         |         |         |         |         |         |         |     |
| CL   | -0.800* | n.s      | n.s     | 0.681*   | n.s      | n.s      | -0.701* |         |         |         |         |         |         |         |         |         |         |     |
| Na   | 0.755*  | n.s      | n.s     | n.s      | n.s      | n.s      | n.s     | n.s     |         |         |         |         |         |         |         |         |         |     |
| K    | 0.773*  | n.s      | n.s     | n.s      | n.s      | n.s      | n.s     | n.s     | 0.973** |         |         |         |         |         |         |         |         |     |
| Mg   | n.s     | -0.951** | -0.762* | -0.925** | -0.880** | -0.802** | -0.802* | n.s     | n.s.    | n.s.    |         |         |         |         |         |         |         |     |
| Ca   | n.s     | -0.970** | -0.739* | -0.949** | -0.860** | -0.767*  | 0.874** | n.s     | n.s.    | n.s.    | 0.986** |         |         |         |         |         |         |     |
| Cu   | 0.885*  | n.s      | n.s     | -0.752*  | n.s      | n.s      | 0.914** | n.s     | 0.760*  | 0.760*  | n.s.    | n.s.    |         |         |         |         |         |     |
| Zn   | 0.898*  | n.s      | n.s     | -0.702*  | n.s      | n.s      | 0.879** | -0.700* | 0.802** | 0.823** | n.s     | n.s     | 0.985** |         |         |         |         |     |
| Mn   | 0.874** | n.s      | n.s     | n.s      | n.s      | n.s      | 0.711*  | -0.709* | 0.715*  | 0.751*  | n.s     | n.s     | 0.826** | 0.865** |         |         |         |     |
| Ni   | 0.861** | n.s      | n.s     | -0.690*  | n.s      | n.s      | 0.786*  | -0.758* | 0.750*  | 0.749*  | n.s     | n.s     | 0.899** | 0.908** | 0.938** |         |         |     |
| Fe   | 0.888** | n.s      | n.s     | -0.760*  | n.s      | n.s      | 0.906** | -0.691* | 0.737*  | 0.770*  | n.s     | n.s     | 0.982** | 0.988** | 0.892** | 0.926** |         |     |
| Cr   | 0.965** | n.s      | n.s     | n.s      | n.s      | n.s      | 0.720*  | -0.732* | 0.886** | 0.899** | n.s     | n.s     | 0.879** | 0.913** | 0.877** | 0.864** | 0.885** |     |
| Pb   | 0.694*  | -0.922** | n.s     | -0.919** | -0.714*  | n.s      | 0.917** | n.s     | n.s     | n.s     | 0.838** | 0.906** | 0.777*  | 0.697*  | n.s     | 0.683*  | 0.762*  | n.s |

**Table 2.** S Correlation coefficient matrix for composts.

|      | Ntot     | TOC      | Stot     | OM       | SH       | WEOC     | P        | CL       | Na      | K    | Mg      | Ca      | Cu      | Zn      | Mn      | Ni      | Fe      | Cr      |
|------|----------|----------|----------|----------|----------|----------|----------|----------|---------|------|---------|---------|---------|---------|---------|---------|---------|---------|
| TOC  | 0.966**  |          |          |          |          |          |          |          |         |      |         |         |         |         |         |         |         |         |
| Stot | 0.777*   | n.s      |          |          |          |          |          |          |         |      |         |         |         |         |         |         |         |         |
| OM   | 0.975**  | 0.946**  | 0.800**  |          |          |          |          |          |         |      |         |         |         |         |         |         |         |         |
| SH   | 0.989**  | 0.964**  | 0.781*   | 0.976**  |          |          |          |          |         |      |         |         |         |         |         |         |         |         |
| WEOC | 0.851**  | 0.709*   | 0.980**  | 0.856**  | 0.852**  |          |          |          |         |      |         |         |         |         |         |         |         |         |
| P    | n.s      | n.s      | n.s      | n.s      | n.s      | n.s      |          |          |         |      |         |         |         |         |         |         |         |         |
| CL   | 0.784*   | n.s      | 0.988**  | 0.797*   | 0.782*   | 0.992**  | n.s      |          |         |      |         |         |         |         |         |         |         |         |
| Na   | -0.709*  | n.s      | -0.861** | -0.766*  | -0.677*  | -0.818** | n.s      | -0.835** |         |      |         |         |         |         |         |         |         |         |
| K    | 0.909**  | 0.854**  | 0.834**  | 0.956**  | 0.917**  | 0.882**  | n.s      | 0.843**  | -0.763* |      |         |         |         |         |         |         |         |         |
| Mg   | n.s      | n.s.     | 0.759*   | n.s.     | n.s.     | 0.691*   | -0.720*  | 0.755*   | n.s.    | n.s. |         |         |         |         |         |         |         |         |
| Ca   | n.s.     | n.s.     | n.s.     | n.s.     | n.s.     | n.s.     | -0.768*  | n.s.     | n.s.    | n.s. | 0.737*  |         |         |         |         |         |         |         |
| Cu   | n.s.     | n.s.     | n.s.     | n.s.     | n.s.     | n.s.     | -0.993** | n.s.     | n.s.    | n.s. | 0.717*  | 0.782*  |         |         |         |         |         |         |
| Zn   | n.s.     | -0.768*  | n.s.     | n.s.     | n.s.     | n.s.     | -0.895** | n.s.     | n.s.    | n.s. | n.s.    | 0.764*  | 0.918** |         |         |         |         |         |
| Mn   | n.s.     | n.s.     | -0.796*  | n.s.     | n.s.     | -0.780*  | 0.710*   | -0.834** | n.s.    | n.s. | -0.840* | n.s.    | n.s.    | n.s.    |         |         |         |         |
| Ni   | n.s.     | n.s.     | n.s.     | n.s.     | n.s.     | n.s.     | -0.907** | n.s.     | n.s.    | n.s. | 0.764*  | 0.827** | 0.911** | 0.845** | -0.676* |         |         |         |
| Fe   | -0.857** | -0.924** | n.s.     | -0.830** | -0.876** | n.s.     | n.s.     | n.s.     | n.s.    | n.s. | n.s.    | n.s.    | 0.877** | n.s.    | n.s.    |         |         |         |
| Cr   | n.s.     | -0.670*  | n.s.     | n.s.     | n.s.     | n.s.     | -0.938** | n.s.     | n.s.    | n.s. | n.s.    | 0.766*  | 0.965** | 0.974** | n.s.    | 0.870** | 0.804** |         |
| Pb   | n.s.     | n.s.     | n.s.     | n.s.     | n.s.     | n.s.     | -0.993** | n.s.     | n.s.    | n.s. | 0.706*  | 0.813** | 0.988** | 0.919** | n.s.    | 0.919** | n.s.    | 0.949** |
